# Supplementary material
Source: Springer Nature journal article supplement (https://www.springermedizin.de/resource/supplementary/13012_2012_589_MOESM4_ESM.pdf/9630338)

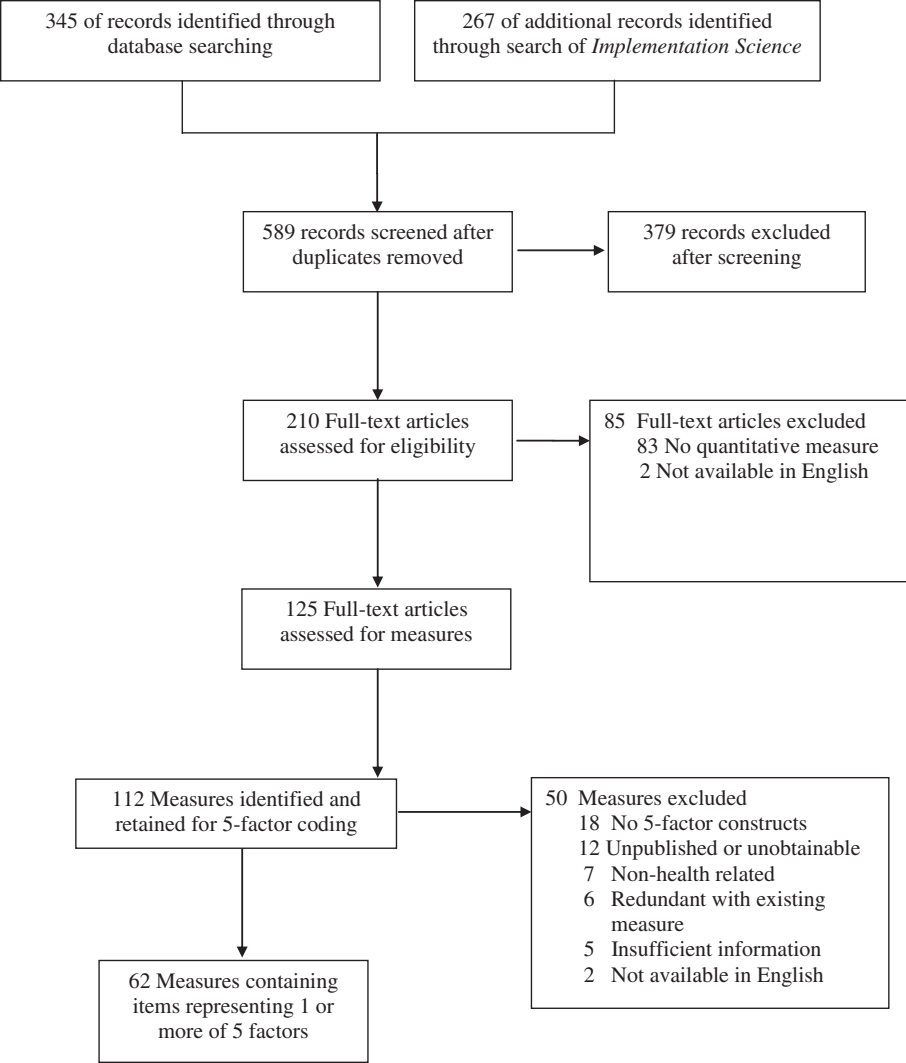

Supplement: MOESM4 [file 9630338]
